# Supplementary material for: Mixing Meds and Milk: Evaluation of a Performance Gap Intervention for Provider Education in Breastfeeding and Maternal Medication Use
Source: MDPI journal article supplement (doi:10.3390/ijerph20196850), 2023-09-28
Supplement: s1 [file s1]

**Table S1. Breastfeeding Training and App Survey Questions**

The supplementary table presents the schedule of the survey items across different time points. In this table, each row represents a specific survey item or question, while columns denote distinct time points of surveys in relation to the training. An “X” denotes that the item was queried in the corresponding survey.

| Question                                                                                                                                                                                                                                                                                                                                                                                                                   | 2021                |                      |                          | 2022                |                      |                          |
|----------------------------------------------------------------------------------------------------------------------------------------------------------------------------------------------------------------------------------------------------------------------------------------------------------------------------------------------------------------------------------------------------------------------------|---------------------|----------------------|--------------------------|---------------------|----------------------|--------------------------|
|                                                                                                                                                                                                                                                                                                                                                                                                                            | Pre-training survey | Post-training survey | 3-month follow up survey | Pre-training survey | Post-training survey | 3-month follow up survey |
| <p>To what extent do you have personal experience with breastfeeding, either for yourself, a family member, or a friend?</p> <p><i>A large amount of experience (4); A moderate amount of experience; A small amount of experience; No experience (1)</i></p>                                                                                                                                                              | X                   |                      |                          | X                   |                      |                          |
| <p>How frequently do you encounter the issue of medication use in breastfeeding women?</p> <p><i>Daily (6); Several times a week; Once a week; 2-3 times a month; Monthly; Less often (1); N/A</i></p>                                                                                                                                                                                                                     | X                   |                      |                          | X                   |                      |                          |
| <p>How <b>familiar</b> are you with evidence-supported medication safety for breastfeeding women in regard to:</p> <ul style="list-style-type: none"> <li>• Common conditions (e.g., mastitis, depression, UTI, postpartum pain)</li> <li>• Chronic conditions (e.g., hypertension, diabetes, chronic pain)</li> <li>• Unique conditions (e.g., transplant, STEMI)</li> <li>• Multiple simultaneous medications</li> </ul> | X                   |                      | X                        | X                   |                      | X                        |

|                                                                                                                                                                                                                                                                                                                                                                                                                                                                                                                                                                                                                                                                                                             |   |    |   |   |    |   |
|-------------------------------------------------------------------------------------------------------------------------------------------------------------------------------------------------------------------------------------------------------------------------------------------------------------------------------------------------------------------------------------------------------------------------------------------------------------------------------------------------------------------------------------------------------------------------------------------------------------------------------------------------------------------------------------------------------------|---|----|---|---|----|---|
| Extremely familiar (4); Very familiar; Slightly familiar; Not at all familiar (1); N/A                                                                                                                                                                                                                                                                                                                                                                                                                                                                                                                                                                                                                      |   |    |   |   |    |   |
| <p>How <b>confident</b> do you feel when making recommendations to breastfeeding women in regard to medications and:</p> <ul style="list-style-type: none"> <li>Common conditions (e.g., mastitis, depression, UTI, postpartum pain)</li> <li>Chronic conditions (e.g., hypertension, diabetes, chronic pain)</li> <li>Unique conditions (e.g., transplant, STEMI)</li> <li>Multiple simultaneous medications</li> </ul> <p>*Post-Webinar survey adjustment: [After the training, how confident do you feel about making future recommendations to breastfeeding women in regard to medications and:]</p> <p>Extremely confident (4); Very confident; Slightly confident; Not at all confident (1); N/A</p> | X | X* | X | X | X* | X |
| <p>In the past 3 months, when addressing the issue of medication use in breastfeeding women, how often did you utilize the following resources?</p> <ul style="list-style-type: none"> <li>Personal experience</li> <li>A trusted colleague</li> <li>Internet search (e.g., Google)</li> <li>literature search (e.g., PubMed, GoogleScholar)</li> <li>Information from drug manufacturer (e.g., package insert, drug representative)</li> <li>Medical reference (e.g., Epocrates, UpToDate, MedScape, Lexicomp)</li> </ul>                                                                                                                                                                                  | X |    | X | X |    | X |

|                                                                                                                                                                                                                                                                                          |  |   |   |  |   |   |
|------------------------------------------------------------------------------------------------------------------------------------------------------------------------------------------------------------------------------------------------------------------------------------------|--|---|---|--|---|---|
| <ul style="list-style-type: none"> <li>Lactation-specific reference (e.g., Lactmed, Hale's Medications and Mother's Milk, MommyMeds app, InfantRisk HCP app, Brigg's Drugs in Pregnancy in Lactation)</li> <li>Other: _____</li> </ul> <p><i>Always (4); Often; Seldom; Never(1)</i></p> |  |   |   |  |   |   |
| <p>Please rate the extent to which the presenter was knowledgeable, organized, and effective in his presentation.</p> <p><i>Very good; Good; Fair; Poor</i></p>                                                                                                                          |  | X |   |  | X |   |
| <p>To what extent were the educational objectives achieved?</p> <p><i>Very good; Good; Fair; Poor</i></p>                                                                                                                                                                                |  | X |   |  | X |   |
| <p>How likely will the information presented be integrated into your practice?</p> <p><i>Very likely (4); Somewhat likely; Somewhat unlikely; Very unlikely (1)</i></p>                                                                                                                  |  | X |   |  | X |   |
| <p>What did you like or dislike about the InfantRisk app? (free text)</p>                                                                                                                                                                                                                |  |   | X |  |   | X |
| <p>How helpful did you find the following components of this program?</p> <ul style="list-style-type: none"> <li>Webinar training</li> <li>InfantRisk HCP app</li> </ul> <p><i>Very helpful (3); somewhat helpful; Not helpful (1); Not applicable</i></p>                               |  |   | X |  |   |   |
| <p>How important do you think it is for healthcare providers to have training on medications and breastfeeding?</p>                                                                                                                                                                      |  |   | X |  |   | X |

|                                                                                                                                                                               |   |   |   |   |   |   |
|-------------------------------------------------------------------------------------------------------------------------------------------------------------------------------|---|---|---|---|---|---|
| <i>Very important (4); Important; Unimportant; Very unimportant (1)</i>                                                                                                       |   |   |   |   |   |   |
| Do you feel you need additional training in the medical management of breastfeeding women? (yes/no)<br>If yes: What types of training would you find most useful? (free text) |   |   | X |   |   | X |
| Is there anything else you would like to tell us? [free text]                                                                                                                 | X | X | X | X | X | X |
| Which field most closely aligns with your current work?                                                                                                                       |   |   |   | X | X | X |
| Have you used the InfantRisk HCP app since the webinar?                                                                                                                       |   |   | X |   |   | X |
| Role                                                                                                                                                                          |   |   |   |   | X | X |
| ParticipantID                                                                                                                                                                 | X | X | X | X | X | X |
